# Supplementary material for: Association of Timely Outpatient Mental Health Services for Youths After Psychiatric Hospitalization With Risk of Death by Suicide
Source: PubMed Central journal article supplement (PMC7420244; doi:10.1001/jamanetworkopen.2020.12887), 2020-08-11
Supplement: jamanetwopen-3-e2012887-s001.pdf [file jamanetwopen-3-e2012887-s001.pdf]

## Supplementary Online Content

Fontanella CA, Warner LA, Steelesmith DL, Brock G, Bridge JA, Campo JV. Association of timely outpatient mental health services for youths after psychiatric hospitalization with risk of death by suicide. *JAMA Netw Open*. 2020;3(8):e2012887.  
doi:10.1001/jamanetworkopen.2020.12887

**eTable 1.** Standardized Mean Differences

**eTable 2.** Demographic and Clinical Characteristics of Suicide Decedents (N=22)

**eFigure.** Distribution of propensity scores for receipt of a follow-up mental health (MH) visit within 7 days

This supplementary material has been provided by the authors to give readers additional information about their work.

**eTable 1. Unweighted and Weighted Standardized Mean Differences**

| <b>Variable</b>                     | <b>Levels</b>                | <b>Unweighted Standardized Mean Difference</b> | <b>Weighted Standardized Mean Difference</b> |
|-------------------------------------|------------------------------|------------------------------------------------|----------------------------------------------|
| Age Group (Years)                   | 10-13                        | 0.11                                           | 0.001                                        |
|                                     | 14-18                        |                                                |                                              |
| Sex                                 | Female                       | 0.015                                          | 0.001                                        |
|                                     | Male                         |                                                |                                              |
| Race/Ethnicity                      | White                        | 0.086                                          | 0.001                                        |
|                                     | Black                        |                                                |                                              |
|                                     | Hispanic                     |                                                |                                              |
|                                     | Other <sup>a</sup>           |                                                |                                              |
| Eligibility Status                  | Poverty                      | 0.153                                          | 0.004                                        |
|                                     | Disabled                     |                                                |                                              |
|                                     | Foster Care                  |                                                |                                              |
| Insurance Type                      | Fee for Service              | 0.115                                          | 0.002                                        |
|                                     | Managed Care                 |                                                |                                              |
| Length of Stay (Days)               | [0,3]                        | 0.27                                           | 0.004                                        |
|                                     | (3,5]                        |                                                |                                              |
|                                     | (5,7]                        |                                                |                                              |
|                                     | (7,12]                       |                                                |                                              |
|                                     | (12,30]                      |                                                |                                              |
|                                     |                              |                                                |                                              |
| Primary Discharge Diagnosis         | Depression                   | 0.268                                          | 0.004                                        |
|                                     | Bipolar & other mood         |                                                |                                              |
|                                     | Anxiety                      |                                                |                                              |
|                                     | ADHD                         |                                                |                                              |
|                                     | Substance use                |                                                |                                              |
|                                     | Adjustment                   |                                                |                                              |
|                                     | Conduct/Oppositional Defiant |                                                |                                              |
|                                     | Schizophrenia                |                                                |                                              |
|                                     | Other <sup>b</sup>           |                                                |                                              |
|                                     |                              |                                                |                                              |
| Number of Psychiatric Comorbidities | 0                            | 0.17                                           | 0.005                                        |
|                                     | 1                            |                                                |                                              |
|                                     | 2+                           |                                                |                                              |
| Chronic Medical Condition           | No                           | 0.037                                          | 0.002                                        |
|                                     | Yes                          |                                                |                                              |
| Recent Self-Harm                    | No                           | 0.012                                          | 0.001                                        |
|                                     | Yes                          |                                                |                                              |

| <b>Variable</b>            | <b>Levels</b> | <b>Unweighted Standardized Mean Difference</b> | <b>Weighted Standardized Mean Difference</b> |
|----------------------------|---------------|------------------------------------------------|----------------------------------------------|
| Prior Inpatient            | No            | 0.033                                          | 0.002                                        |
|                            | Yes           |                                                |                                              |
| Prior Emergency Department | No            | 0.065                                          | 0.003                                        |
|                            | Yes           |                                                |                                              |
| Prior Outpatient           | No            | 0.196                                          | 0.006                                        |

Abbreviations. ADHD = Attention deficit hyperactivity disorder.

<sup>a</sup> Includes Native American or Alaskan, Asian, Native Hawaiian or other Pacific Islander, and more than one race. <sup>b</sup> Includes all mental health disorders coded as ICD-9-CM diagnosis codes 290-319 not otherwise categorized above.

**eTable 2. Demographic and Clinical Characteristics of Suicide Decedents (N=22)**

|                                                | N  | %  |
|------------------------------------------------|----|----|
| Age (Years)                                    |    |    |
| 10-13                                          | 3  | 14 |
| 14-18                                          | 19 | 86 |
| Sex                                            |    |    |
| Female                                         | 9  | 41 |
| Male                                           | 13 | 59 |
| Race/Ethnicity                                 |    |    |
| Non-Hispanic White                             | 14 | 64 |
| Other <sup>a</sup>                             | 8  | 36 |
| Eligibility Status                             |    |    |
| Poverty                                        | 18 | 82 |
| Other <sup>b</sup>                             | 4  | 18 |
| Insurance Type                                 |    |    |
| Fee for Service                                | 11 | 50 |
| Managed Care                                   | 11 | 50 |
| Length of Stay (Days)                          |    |    |
| 1-8                                            | 19 | 86 |
| 9-30                                           | 3  | 14 |
| Primary Discharge Diagnosis                    |    |    |
| Depression                                     | 12 | 55 |
| Bipolar other mood                             | 6  | 27 |
| Other <sup>c</sup>                             | 4  | 18 |
| Any Substance Use Disorder                     | 3  | 14 |
| Prior Mental Health Emergency Department Visit | 8  | 36 |
| Prior Mental Health Outpatient Visit           | 11 | 50 |
| Number of Psychiatric Comorbidities            |    |    |
| 0                                              | 9  | 41 |
| 1                                              | 4  | 18 |
| 2                                              | 5  | 23 |
| 3+                                             | 4  | 18 |
| Chronic Medical Condition                      | 1  | 5  |
| Time to Suicide                                |    |    |
| ≤ 30 days                                      | 5  | 23 |
| 31 to ≤90 days                                 | 8  | 36 |
| 91+ days                                       | 9  | 41 |
| Method of Suicide                              |    |    |
| Hanging/Suffocation                            | 15 | 68 |
| Firearm                                        | 5  | 23 |
| Other <sup>d</sup>                             | 2  | 9  |

Note. No decedents had prior mental health inpatient visits or prior self-harm.

<sup>a</sup>Includes non-Hispanic black, Hispanic, Asian American, and multiple races. <sup>b</sup>Includes disabled and foster care. <sup>c</sup>Includes substance use, adjustment disorder and schizophrenia. <sup>d</sup>Includes jumping from high place and other/unspecified means.

**eFigure. Distribution of propensity scores for receipt of a follow-up mental health (MH) visit within 7 days, stratified by those who did and did not receive a follow-up visit within 7 days.**

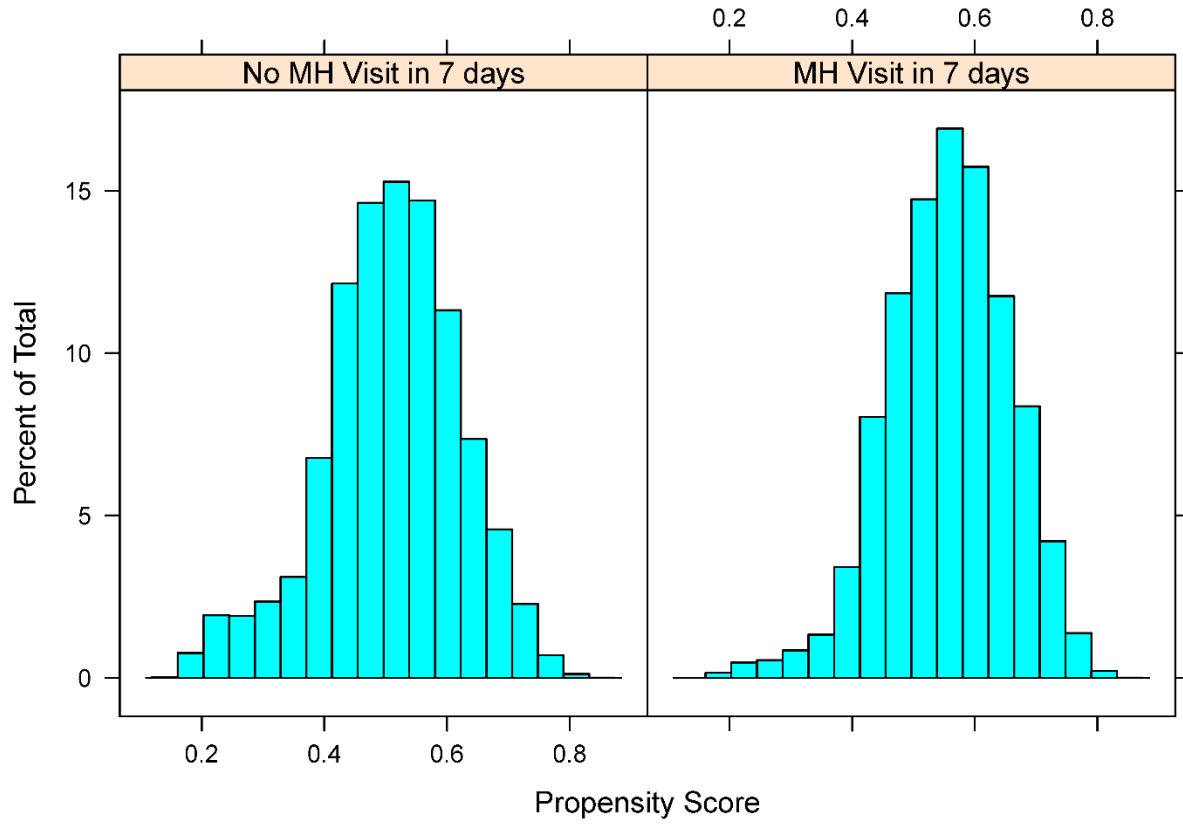

Note. The range of the propensity scores was 0.147 to 0.846.
